# Supplementary material for: Expression of EMP 1, 2, and 3 in Adrenal Cortical Neoplasm and Pheochromocytoma
Source: MDPI journal article supplement (doi:10.3390/ijms241613016), 2023-08-21

**Table S1.** Source, clone, and dilution of antibodies

| Antibody | Company              | Clone      | Dilution |
|----------|----------------------|------------|----------|
| EMP1     | Abcam, Cambridge, UK | Polyclonal | 1:100    |
| EMP2     | Abcam, Cambridge, UK | Polyclonal | 1:50     |
| EMP3     | Abcam, Cambridge, UK | SW-5       | 1:100    |

**Table S2.** Basal characteristics of adrenal cortical neoplasm

| Parameters                                                            | Total<br>N=132 (%) | Adrenal cortical<br>adenoma<br>n=115 (%) | Adrenal cortical<br>carcinoma<br>n=17 (%) | p-value          |
|-----------------------------------------------------------------------|--------------------|------------------------------------------|-------------------------------------------|------------------|
| Age (year, mean±SD)                                                   | 47.5±14.5          | 48.4±12.2                                | 41.0±25.1                                 | <b>0.048</b>     |
| Sex                                                                   |                    |                                          |                                           | 0.107            |
| Male                                                                  | 40 (30.3)          | 32 (27.8)                                | 8 (47.1)                                  |                  |
| Female                                                                | 92 (69.7)          | 83 (72.2)                                | 9 (52.9)                                  |                  |
| Tumor size (cm, mean±SD)                                              | 3.6±3.7            | 2.5±1.3                                  | 10.9±5.8                                  | <b>&lt;0.001</b> |
| Fuhrman grade                                                         |                    |                                          |                                           | <b>&lt;0.001</b> |
| 1 and 2                                                               | 106 (80.3)         | 102 (88.7)                               | 4 (23.5)                                  |                  |
| 3 and 4                                                               | 26 (19.7)          | 13 (11.3)                                | 13 (76.5)                                 |                  |
| Mitosis                                                               |                    |                                          |                                           | <b>&lt;0.001</b> |
| ≤ 5/50 HPFs                                                           | 122 (92.4)         | 115 (100.0)                              | 7 (41.2)                                  |                  |
| > 5/50 HPFs                                                           | 10 (7.6)           | 0 (0.0)                                  | 10 (58.8)                                 |                  |
| Atypical mitosis                                                      |                    |                                          |                                           | <b>&lt;0.001</b> |
| Absent                                                                | 121 (91.7)         | 114 (99.1)                               | 7 (41.2)                                  |                  |
| Present                                                               | 11 (8.3)           | 1 (0.9)                                  | 10 (58.8)                                 |                  |
| Clear cell proportion                                                 |                    |                                          |                                           | <b>&lt;0.001</b> |
| ≥ 25%                                                                 | 96 (72.7)          | 95 (82.6)                                | 1 (5.9)                                   |                  |
| < 25%                                                                 | 36 (27.3)          | 20 (17.4)                                | 16 (94.1)                                 |                  |
| Diffuse architecture                                                  |                    |                                          |                                           | <b>&lt;0.001</b> |
| < 1/3                                                                 | 117 (88.6)         | 111 (96.5)                               | 6 (35.3)                                  |                  |
| ≥ 1/3                                                                 | 15 (11.4)          | 4 (3.5)                                  | 11 (64.7)                                 |                  |
| Necrosis                                                              |                    |                                          |                                           | <b>&lt;0.001</b> |
| Absent                                                                | 113 (85.6)         | 113 (98.3)                               | 0 (0.0)                                   |                  |
| Present                                                               | 19 (14.4)          | 2 (1.7)                                  | 17 (100.0)                                |                  |
| Venous invasion                                                       |                    |                                          |                                           | <b>&lt;0.001</b> |
| Absent                                                                | 126 (95.5)         | 115 (100.0)                              | 11 (64.7)                                 |                  |
| Present                                                               | 6 (4.5)            | 0 (0.0)                                  | 6 (35.3)                                  |                  |
| Sinusoidal invasion                                                   |                    |                                          |                                           | <b>&lt;0.001</b> |
| Absent                                                                | 126 (95.5)         | 115 (100.0)                              | 11 (64.7)                                 |                  |
| Present                                                               | 6 (4.5)            | 0 (0.0)                                  | 6 (35.3)                                  |                  |
| Capsular invasion                                                     |                    |                                          |                                           | <b>&lt;0.001</b> |
| Absent                                                                | 117 (88.6)         | 111 (96.5)                               | 6 (35.3)                                  |                  |
| Present                                                               | 15 (11.4)          | 4 (3.5)                                  | 11 (64.7)                                 |                  |
| Weiss total score                                                     |                    |                                          |                                           | <b>&lt;0.001</b> |
| < 4                                                                   | 117 (88.6)         | 115 (100.0)                              | 2 (11.8)*                                 |                  |
| ≥ 4                                                                   | 15 (11.4)          | 0 (0.0)                                  | 15 (88.2)                                 |                  |
| <u>Serum aldosterone level<sup>#</sup></u><br><u>(pg/mL, mean±SD)</u> | <u>262.3±269.8</u> | <u>272.0±278.0</u>                       | <u>160.7±128.5</u>                        | <u>0.239</u>     |
| Recurrence                                                            | 3 (2.3)            | 0 (0.0)                                  | 3 (17.6)                                  | <b>&lt;0.001</b> |
| Distant metastasis                                                    | 7 (5.3)            | 0 (0.0)                                  | 7 (41.2)                                  | <b>&lt;0.001</b> |
| Patient death                                                         | 9 (6.8)            | 0 (0.0)                                  | 9 (52.9)                                  | <b>&lt;0.001</b> |

SD, standard deviation

\*Although the Weiss score was 4 or less, it was diagnosed as adrenal cortical carcinoma as metastases were present at the time of diagnosis.

# Only 103 cases with serum aldosterone level data were included.

**Table S3.** Basal characteristics of pheochromocytoma

| Parameters                    | Total, N=189 (%) |
|-------------------------------|------------------|
| Age (year, mean±SD)           | 48.1±13.7        |
| Sex                           |                  |
| Male                          | 73 (38.6)        |
| Female                        | 116 (61.4)       |
| Tumor size (cm, mean±SD)      | 5.0±3.4          |
| Histologic pattern            |                  |
| Zellballen                    | 165 (87.3)       |
| Non-Zellballen                | 24 (12.7)        |
| Cellularity                   |                  |
| Low                           | 11 (5.8)         |
| Moderate                      | 162 (85.7)       |
| High                          | 16 (8.5)         |
| Comedo necrosis               |                  |
| Absent                        | 189 (100.0)      |
| Present                       | 0 (0.0)          |
| Vascular or capsular invasion |                  |
| Absent                        | 129 (68.3)       |
| Present                       | 60 (31.7)        |
| Ki-67 labeling index (%)      |                  |
| <1                            | 139 (73.5)       |
| 1-3                           | 38 (20.1)        |
| >3                            | 12 (6.3)         |
| Catecholamine type*           |                  |
| Non-norepinephrine type       | 154 (81.5)       |
| Norepinephrine type           | 35 (18.5)        |

24 hour urine catecholamine level

|                                                                                    |                     |
|------------------------------------------------------------------------------------|---------------------|
| <u>Epinephrine (µg/day, mean±SD)</u>                                               | <u>99.9±198.3</u>   |
| <u>Norepinephrine (µg/day, mean±SD)</u>                                            | <u>386.1±1055.2</u> |
| GAPP score                                                                         |                     |
| 0-2 (well-differentiated type)                                                     | 138 (73.0)          |
| 3-6 (moderately differentiated type)                                               | 50 (26.5)           |
| 7-10 (poorly differentiated type)                                                  | 1 (0.5)             |
| Tumor recurrence                                                                   | 5 (2.6)             |
| Distant metastasis                                                                 | 7 (3.7)             |
| Patient death                                                                      | 11 (5.8)            |
| <hr/>                                                                              |                     |
| <u>* Only 138 cases with 24-hour urine catecholamine study data were included.</u> |                     |

**Table S4.** Difference in IHC proportion score based on IHC intensity score in adrenal neoplasm

| IHC<br>proportion<br>score<br>(mean±SD) | Adrenal cortical neoplasm |           |           |             | Pheochromocytoma    |           |           |             |
|-----------------------------------------|---------------------------|-----------|-----------|-------------|---------------------|-----------|-----------|-------------|
|                                         | IHC intensity score       |           |           | p-<br>value | IHC intensity score |           |           | p-<br>value |
|                                         | 1                         | 2         | 3         |             | 1                   | 2         | 3         |             |
| EMP1                                    | 39.8±35.2                 | 65.1±33.2 | 98.7±5.0  | <0.001      | 74.1±31.5           | 84.6±23.9 | 98.7±3.5  | 0.011       |
| EMP2                                    | 41.4±35.7                 | n/a       | n/a       | n/a         | 43.3±15.2           | n/a       | n/a       | n/a         |
| EMP3                                    | 52.3±38.7                 | 66.9±35.6 | 92.0±10.9 | 0.045       | 84.6±25.8           | 90.1±16.5 | 100.0±0.0 | 0.111       |

**Table S5.** H-scores of EMP 1, 2, and 3 in adrenal cortical neoplasm

| EMP type | Total<br>N=132<br>(mean±SD) | Adrenal cortical<br>adenoma, n=115<br>(mean±SD) | Adrenal cortical<br>carcinoma, n=17<br>(mean±SD) | p-value          |
|----------|-----------------------------|-------------------------------------------------|--------------------------------------------------|------------------|
| EMP1     | 91.6±101.0                  | 73.6±89.6                                       | 213.5±91.0                                       | <b>&lt;0.001</b> |
| EMP2     | 2.2±12.0                    | 2.5±12.8                                        | 0.0±0.0                                          | 0.423            |
| EMP3     | 63.4±82.4                   | 51.7±78.5                                       | 142.9±63.1                                       | <b>&lt;0.001</b> |

**Table S6.** Serum aldosterone level according to EMP 1, 2, and 3 statuses in adrenal cortical neoplasm

| <u>EMP type</u> | <u>Serum aldosterone level</u><br><u>(pg/mL, mean±SD)</u> | <u>p-value</u>      |
|-----------------|-----------------------------------------------------------|---------------------|
| <u>EMP 1</u>    |                                                           | <b><u>0.001</u></b> |
| <u>Low</u>      | <u>321.9±295.7</u>                                        |                     |
| <u>High</u>     | <u>146.5±158.7</u>                                        |                     |
| <u>EMP 2</u>    |                                                           | <u>0.300</u>        |
| <u>Low</u>      | <u>268.5±273.7</u>                                        |                     |
| <u>High</u>     | <u>139.8±138.8</u>                                        |                     |
| <u>EMP 3</u>    |                                                           | <b><u>0.008</u></b> |
| <u>Low</u>      | <u>310.6±296.5</u>                                        |                     |
| <u>High</u>     | <u>159.9±162.9</u>                                        |                     |

**Table S7.** H-scores of EMP 1, 2, and 3 in pheochromocytoma according to GAPP score

| EMP type | Total<br>N=189 (mean±SD) | GAPP < 3<br>n=138 (mean±SD) | GAPP ≥ 3<br>n=51 (mean±SD) | p-value      |
|----------|--------------------------|-----------------------------|----------------------------|--------------|
| EMP1     | 105.9±78.4               | 97.8±75.3                   | 128.0±83.0                 | <b>0.018</b> |
| EMP2     | 0.6±5.6                  | 0.9±6.6                     | 0.0±0.0                    | 0.311        |
| EMP3     | 102.5±80.1               | 101.9±80.4                  | 104.1±80.3                 | 0.870        |

GAPP, grading system for adrenal pheochromocytoma and paraganglioma

**Table S8.** 24-hour urine catecholamine level according to EMP 1, 2, and 3 statuses in pheochromocytoma

| <u>EMP type</u> | <u>Epinephrine</u><br><u>(<math>\mu\text{g/day}</math>, mean<math>\pm</math>SD)</u> | <u>p-value</u> | <u>Norepinephrine</u><br><u>(<math>\mu\text{g/day}</math>, mean<math>\pm</math>SD)</u> | <u>p-value</u> |
|-----------------|-------------------------------------------------------------------------------------|----------------|----------------------------------------------------------------------------------------|----------------|
| <u>EMP 1</u>    |                                                                                     | <u>0.633</u>   |                                                                                        | <u>0.354</u>   |
| <u>Low</u>      | <u>105.7<math>\pm</math>194.3</u>                                                   |                | <u>325.9<math>\pm</math>680.9</u>                                                      |                |
| <u>High</u>     | <u>88.6<math>\pm</math>207.5</u>                                                    |                | <u>502.4<math>\pm</math>1545.4</u>                                                     |                |
| <u>EMP 2</u>    |                                                                                     | <u>0.321</u>   |                                                                                        | <u>0.718</u>   |
| <u>Low</u>      | <u>97.4<math>\pm</math>194.9</u>                                                    |                | <u>390.9<math>\pm</math>1066.2</u>                                                     |                |
| <u>High</u>     | <u>212.7<math>\pm</math>358.1</u>                                                   |                | <u>167.2<math>\pm</math>178.0</u>                                                      |                |
| <u>EMP 3</u>    |                                                                                     | <u>0.731</u>   |                                                                                        | <u>0.504</u>   |
| <u>Low</u>      | <u>104.4<math>\pm</math>213.8</u>                                                   |                | <u>339.1<math>\pm</math>670.4</u>                                                      |                |
| <u>High</u>     | <u>92.4<math>\pm</math>171.3</u>                                                    |                | <u>463.6<math>\pm</math>1494.0</u>                                                     |                |

**Figure S1.** Immunohistochemical stain for EMP 1, EMP2 and EMP3 in normal adrenal gland. EMP 1, EMP2 and EMP3 show membranous and/or cytoplasmic expression in adrenal cortical and adrenal medulla cells (X400).

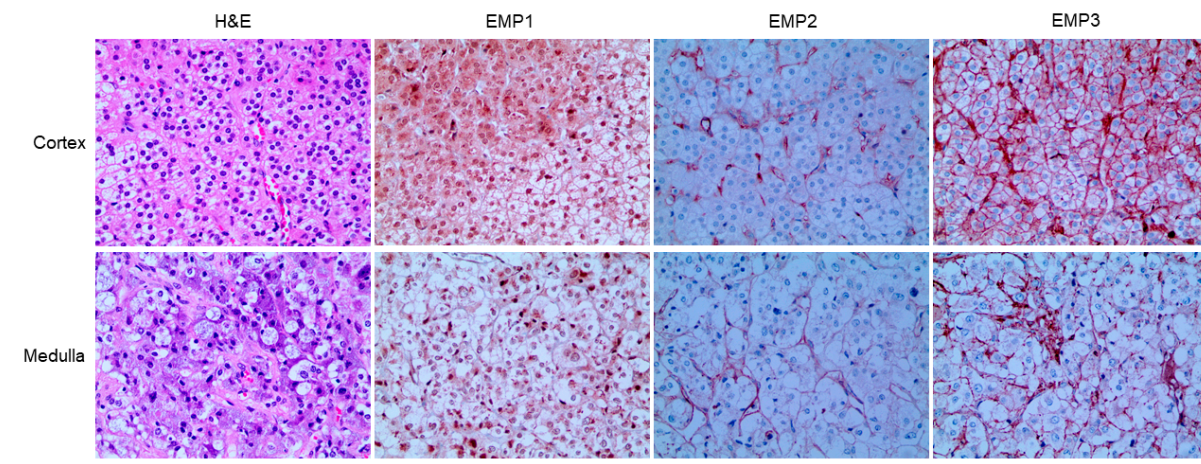

Supplement: s1 [file s1]
